# Supplementary material
Source: PubMed Central journal article supplement (PMC4211650)
Supplement: bi501010q_si_001.pdf [file bi501010q_si_001.pdf]

Supporting Information for

Polyglutamine amyloid core boundaries  
and flanking domain dynamics in huntingtin fragment  
fibrils determined by solid-state NMR

*Cody L. Hoop, Hsiang-Kai Lin, Karunakar Kar, Zhipeng Hou, Michelle A Poirier, Ronald Wetzel, and  
Patrick C.A. van der Wel*

Department of Structural Biology, University of Pittsburgh School of Medicine, Biomedical Science  
Tower 3, 3501 Fifth Ave, Pittsburgh, Pennsylvania 15260, USA

Division of Neurobiology, Department of Psychiatry, Children's Medical Surgical Center, Johns  
Hopkins University School of Medicine, Baltimore, MD 21287, USA

**Table S1- Detailed experimental conditions of NMR experiments shown in the main text and SI. Abbreviations:** NS, number of scans per  $t_1$  point; Temp., temperature; MAS, magic angle spinning rate; RD, recycle delay; TPPM,  $^1\text{H}$  decoupling power during evolution and acquisition (using two-pulse phase modulation scheme).

| 1D Spectra   |                                                                                                             |                                    |      |          |           |        |                        |                                 |                                         |
|--------------|-------------------------------------------------------------------------------------------------------------|------------------------------------|------|----------|-----------|--------|------------------------|---------------------------------|-----------------------------------------|
| Fig.         | Sample (refer to Table 1 in main text)                                                                      | Experiment                         | NS   | Temp (K) | MAS (kHz) | RD (s) | TPPM during acq. (kHz) | T <sub>2</sub> filter time (ms) | $^1\text{H}$ - $^1\text{H}$ Mixing (ms) |
| 2a, 3a,d, S1 | LQP-labeled                                                                                                 | $^1\text{H}$ - $^{13}\text{C}$ CP  | 1024 | 275      | 9.8       | 2.8    | 83                     | NA                              | NA                                      |
| 2b           | htt <sup>NT</sup> Q <sub>30</sub> P <sub>10</sub> K <sub>2</sub> *                                          | $^1\text{H}$ - $^{13}\text{C}$ CP  | 2662 | 275      | 10        | 3      | 83                     | NA                              | NA                                      |
| 3b,c         | LQP-labeled                                                                                                 | $^1\text{H}$ T <sub>2</sub> filter | 3072 | 275      | 9.8       | 2.8    | 83                     | 3.0                             | 0                                       |
| 3c           | LQP-labeled                                                                                                 | $^1\text{H}$ T <sub>2</sub> filter | 3072 | 275      | 9.8       | 2.8    | 83                     | 3.0                             | 1                                       |
| 3c           | LQP-labeled                                                                                                 | $^1\text{H}$ T <sub>2</sub> filter | 3072 | 275      | 9.8       | 2.8    | 83                     | 3.0                             | 2                                       |
| 3c           | LQP-labeled                                                                                                 | $^1\text{H}$ T <sub>2</sub> filter | 3072 | 275      | 9.8       | 2.8    | 83                     | 3.0                             | 3                                       |
| 3c           | LQP-labeled                                                                                                 | $^1\text{H}$ T <sub>2</sub> filter | 3072 | 275      | 9.8       | 2.8    | 83                     | 3.0                             | 4                                       |
| 3b,c         | LQP-labeled                                                                                                 | $^1\text{H}$ T <sub>2</sub> filter | 3072 | 275      | 9.8       | 2.8    | 83                     | 3.0                             | 7                                       |
| 3d           | LQP-labeled                                                                                                 | $^1\text{H}$ - $^{13}\text{C}$ DP  | 1024 | 275      | 9.8       | 2.8    | 83                     | NA                              | NA                                      |
| 5a           | MA-labeled                                                                                                  | $^{15}\text{N}$ T <sub>1</sub>     | 1024 | 315      | 22        | 3      | 83                     | NA                              | NA                                      |
| 5a           | MA-labeled                                                                                                  | $^{15}\text{N}$ T <sub>1</sub>     | 1024 | 273      | 19        | 3      | 83                     | NA                              | NA                                      |
| 5b           | [U- $^{13}\text{C}$ , $^{15}\text{N}$ -Q10]-K <sub>2</sub> Q <sub>11</sub> PGQ <sub>11</sub> D <sub>2</sub> | $^{15}\text{N}$ T <sub>1</sub>     | 790  | 275      | 22        | 6      | 83                     | NA                              | NA                                      |
| 5c,d         | MA-labeled                                                                                                  | N-H dipolar coupling               | 2048 | 287      | 10        | 3      | 83                     | NA                              | NA                                      |
| 5c,d         | MA-labeled                                                                                                  | N-H dipolar coupling               | 2048 | 250      | 10        | 3      | 83                     | NA                              | NA                                      |
| 5e           | [U- $^{13}\text{C}$ , $^{15}\text{N}$ -Q10]-K <sub>2</sub> Q <sub>11</sub> PGQ <sub>11</sub> D <sub>2</sub> | N-H dipolar coupling               | 2048 | 275      | 10        | 3      | 83                     | NA                              | NA                                      |
| 6a           | 1:1 MF-labeled/LAQ-labeled                                                                                  | $^1\text{H}$ - $^{13}\text{C}$ CP  | 256  | 287      | 9.8       | 3      | 83                     | NA                              | NA                                      |
| 6a           | 1:1 MF-labeled/LAQ-labeled                                                                                  | $^1\text{H}$ - $^{13}\text{C}$ DP  | 256  | 287      | 9.8       | 3      | 83                     | NA                              | NA                                      |
| 6b           | 1:1 MF-labeled/LAQ-labeled                                                                                  | $^1\text{H}$ - $^{13}\text{C}$ CP  | 256  | 265      | 9.8       | 3      | 83                     | NA                              | NA                                      |
| 6b           | 1:1 MF-labeled/LAQ-labeled                                                                                  | $^1\text{H}$ - $^{13}\text{C}$ DP  | 256  | 265      | 9.8       | 3      | 83                     | NA                              | NA                                      |
| 6c           | 1:1 MA-labeled/LQP-labeled                                                                                  | $^1\text{H}$ - $^{13}\text{C}$ CP  | 256  | 287      | 9.8       | 3      | 83                     | NA                              | NA                                      |
| 6c           | 1:1 MA-labeled/LQP-labeled                                                                                  | $^1\text{H}$ - $^{13}\text{C}$ DP  | 256  | 287      | 9.8       | 3      | 83                     | NA                              | NA                                      |
| 6d           | 1:1 MA-labeled/LQP-labeled                                                                                  | $^1\text{H}$ - $^{13}\text{C}$ CP  | 256  | 270      | 9.8       | 3      | 83                     | NA                              | NA                                      |
| 6d           | 1:1 MA-labeled/LQP-labeled                                                                                  | $^1\text{H}$ - $^{13}\text{C}$ DP  | 256  | 270      | 9.8       | 3      | 83                     | NA                              | NA                                      |
| S1b          | LKSQ-labeled                                                                                                | $^1\text{H}$ - $^{13}\text{C}$ CP  | 4096 | 275      | 13        | 3.5    | 83                     | NA                              | NA                                      |
| S1b          | LKSQ-labeled                                                                                                | $^1\text{H}$ - $^{13}\text{C}$ DP  | 4096 | 275      | 13        | 3.5    | 83                     | NA                              | NA                                      |

\* Natural abundance signals from htt<sup>NT</sup>Q<sub>30</sub>P<sub>10</sub>K<sub>2</sub> aggregates that lacked isotopic labeling.

| 2D Spectra |                                                |            |     |          |           |        |                        |                           |             |
|------------|------------------------------------------------|------------|-----|----------|-----------|--------|------------------------|---------------------------|-------------|
| Fig.       | Sample (refer to Table 1 in main text)         | Experiment | NS  | Temp (K) | MAS (kHz) | RD (s) | TPPM during acq. (kHz) | t <sub>1</sub> evol. (μs) | Mixing (ms) |
| 1a         | LQP-labeled                                    | DARR 2D    | 64  | 275      | 9.8       | 2.8    | 83                     | 422x33.11                 | 8           |
| 1b         | LQP-labeled                                    | DARR 2D    | 72  | 275      | 9.8       | 2.8    | 83                     | 370x36.78                 | 15          |
| 1c         | LAQ-labeled                                    | DARR 2D    | 128 | 276      | 10        | 2.8    | 83                     | 240x36.78                 | 8           |
| 1d         | LKSQ- labeled                                  | DARR 2D    | 96  | 275      | 13        | 3      | 83                     | 832x19.23                 | 25          |
| 4a,b, S2   | U- <sup>13</sup> C, <sup>15</sup> N-htt exon 1 | DARR 2D    | 256 | 275      | 10        | 2.6    | 83                     | 448x35.60                 | 15          |
| 4b, S2     | LQP-labeled                                    | DARR 2D    | 72  | 275      | 9.8       | 2.8    | 83                     | 370x36.78                 | 15          |
| 4b, S2     | LKSQ- labeled                                  | DARR 2D    | 96  | 275      | 13        | 3      | 83                     | 832x19.23                 | 25          |
| S3a        | MA-labeled                                     | DARR 2D    | 64  | 275      | 10        | 2.8    | 83                     | 422x33.1                  | 8           |

**Table S2 -  $^{13}\text{C}$  and  $^{15}\text{N}$  chemical shift assignments of residues isotopically labeled in  $\text{htt}^{\text{NT}}\text{Q}_{30}\text{P}_{10}\text{K}_2$  peptide fibrils, from this study and from previously published work <sup>1</sup>. The uncertainty in the chemical shifts is  $\pm 0.1$ - $0.3$  ppm unless otherwise stated.  $^{13}\text{C}$  referencing is relative to aqueous DSS (see Experimental Procedures section). These data are also available online at the Biological Magnetic Resonance Data Bank (BMRB), via BMRB accession number 25146.**

| Res. <sup>a)</sup> | C'              | C $\alpha$     | C $\beta$      | C $\gamma$ | C $\delta$ (1) | C $\delta$ 2 | C $\epsilon$ | N           | N $\epsilon$ 2 |
|--------------------|-----------------|----------------|----------------|------------|----------------|--------------|--------------|-------------|----------------|
| A2                 | 178.2           | 52.7           | 19.1           |            |                |              |              |             |                |
| L4                 | 178.4           | 58.0           | 41.4           | 27.0       | 25.3           | 24.2         |              |             |                |
| K6                 | 179.9           | 59.5           | 32.6           | 25.8       | 29.6           |              | 42.1         |             |                |
| L7                 | 178.0           | 57.9           | 42.0           | 26.9       | 25.2           | 24.0         |              | 121.6       |                |
| M8                 | 178.9           | 58.0           | 32.1           | 32.3       |                |              | 17.0         | 118.7       |                |
| A10                | 180.3           | 55.0           | 18.0           |            |                |              |              | 123.2       |                |
| F11                | -               | 61.2           | 39.3           | 131.4      |                |              |              |             |                |
| L14                | 177.0 $\pm$ 0.4 | 55.7 $\pm$ 0.4 | 42.1           | 26.6       | 26.6           | 23.3         |              |             |                |
| S16a               | 173.0 $\pm$ 0.5 | 56.8           | 65.2           |            |                |              |              |             |                |
| S16b               | 173.0 $\pm$ 0.5 | 58.9           | 62.8           |            |                |              |              |             |                |
| F17a               | 175.8           | 57.1           | -              | 131.7      |                |              |              |             |                |
| F17b               | 174.3           | 56.6           | -              | 131.7      |                |              |              |             |                |
| Q18a               | 175.6           | 55.7           | 34.2           | 34.4       | 178.8          |              |              |             |                |
| Q18b               | 174.2           | 54.7           | 30.9           | 30.7       | 177.8          |              |              |             |                |
| Q19a               | 176.0           | 56.0           | 34.2           | 34.2       | 178.6          |              |              |             |                |
| Q19b               | 174.2           | 53.9           | 31.1 $\pm$ 0.4 | 30.6       | 177.6          |              |              |             |                |
| Q46a               | 175.1           | 56.0           | 34.3           | 34.0       | 178.7          |              |              |             |                |
| Q46b               | 174.2           | 54.1           | 31.6           | 30.2       | 178.3          |              |              |             |                |
| Q46c               | -               | -              | -              | 34.1       | 179.8          |              |              |             |                |
| Q47c1              | 172.5           | 53.7           | 29.1           | 33.4       | 180.4          |              |              | 123.1       | 111.4          |
| Q47c2              | 173.0 $\pm$ 0.5 | 53.0           | 30.3           | 34.3       | 178.6          |              |              | 117.7       | 107.7          |
| P48                | 174.2           | 61.3           | 30.5           | 27.3       | 50.5           |              |              | 136 $\pm$ 1 |                |
| Pro NA             | -               | 61.2           | 30.6           | 26.8       | 50.3           |              |              |             |                |

a) For residues with multiple detected conformers, lower-case letters indicate the conformers.

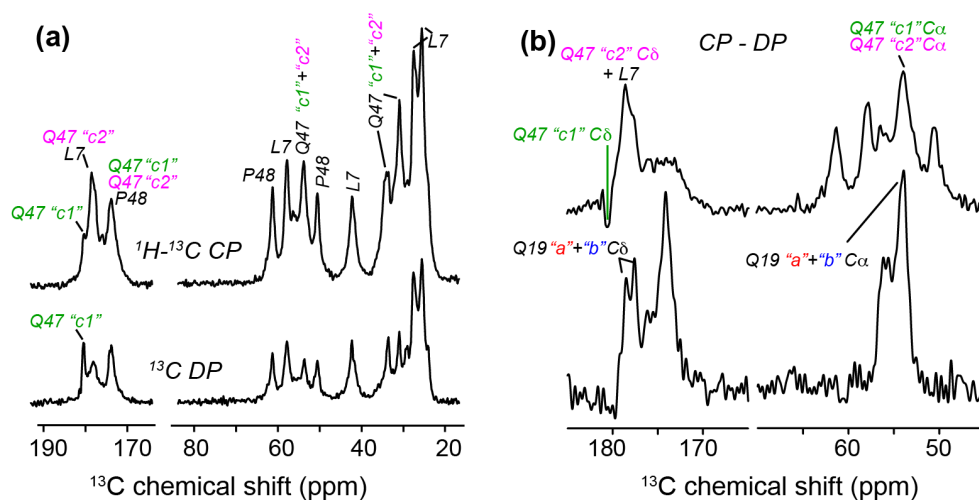

**Figure S1.** Mobility at the Q/P junction. (a) Comparison of  $^1\text{H}$ - $^{13}\text{C}$  CP (top) and  $^{13}\text{C}$  DP (bottom) 1D MAS ssNMR spectra on the LQP-labeled fibrils at 9.8 kHz MAS. Q47 peaks are indicated and color-coded by conformer “c1” (green) and “c2” (magenta). (b) CP-DP difference spectra for fibrils from LQP- (top) and LKSQ-labeled (13 kHz MAS) (bottom) fibrils. High intensity peaks in these difference spectra indicate increased rigidity. Q47 is less rigid than Q19 in the polyQ core, with especially pronounced mobility for the side chain carbonyl group ( $\text{C}\delta$ ) of conformer “c1”. Several Q47 side chain peaks, e.g. the c1  $\text{C}\delta$  (far left in (a)) or the  $\text{C}\beta/\text{C}\gamma$  signals in Fig. 3d, are also significantly narrower, indicative of fast side-chain motion.

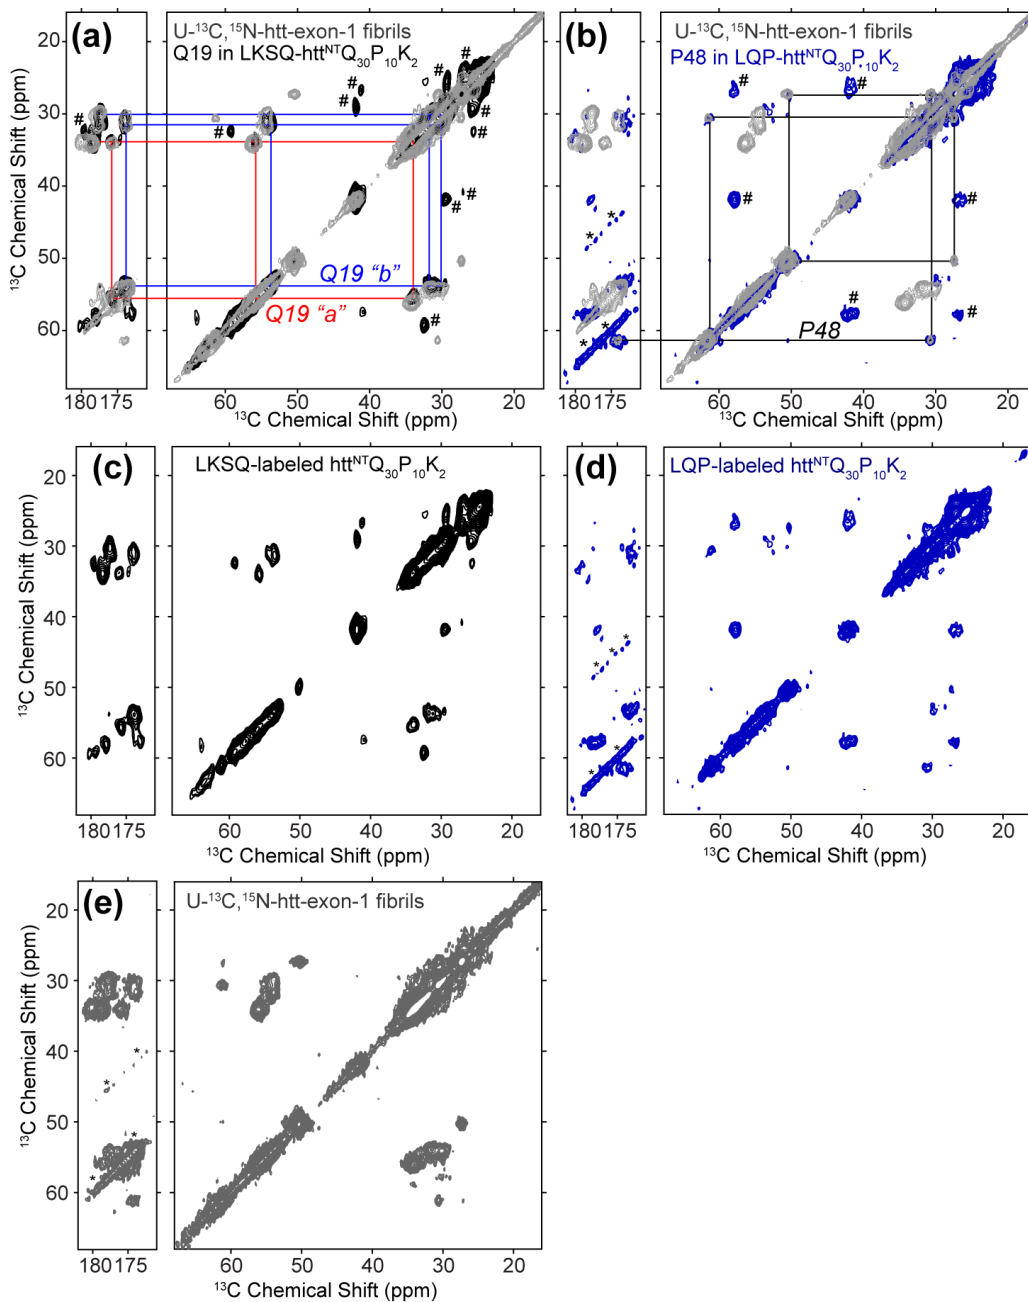

**Figure S2.** Comparison of the signals from polyQ and PRD in  $U\text{-}^{13}\text{C},^{15}\text{N}$  htt exon 1 fibrils and residue-specific labels in  $\text{htt}^{\text{NT}}\text{Q}_{30}\text{P}_{10}\text{K}_2$  fibrils. (a) Overlay of htt exon-1 (grey) and LKSQ-labeled  $\text{htt}^{\text{NT}}\text{Q}_{30}\text{P}_{10}\text{K}_2$  fibrils; Q19 conformers “a” and “b” are marked. (b) Overlay of htt exon-1 (grey) and LQP-labeled  $\text{htt}^{\text{NT}}\text{Q}_{30}\text{P}_{10}\text{K}_2$  fibrils; P48 signals are marked. (c-d) Individual spectra for the  $\text{htt}^{\text{NT}}\text{Q}_{30}\text{P}_{10}\text{K}_2$  fibrils used in the overlays in Fig. 4 and this figure. (e) The  $^{13}\text{C}\text{-}^{13}\text{C}$  2D spectrum of  $U\text{-}^{13}\text{C},^{15}\text{N}$ -labeled fibrils by itself; shown with lower contour levels close to the noise level. Experimental details are in Table S1 and the main text.

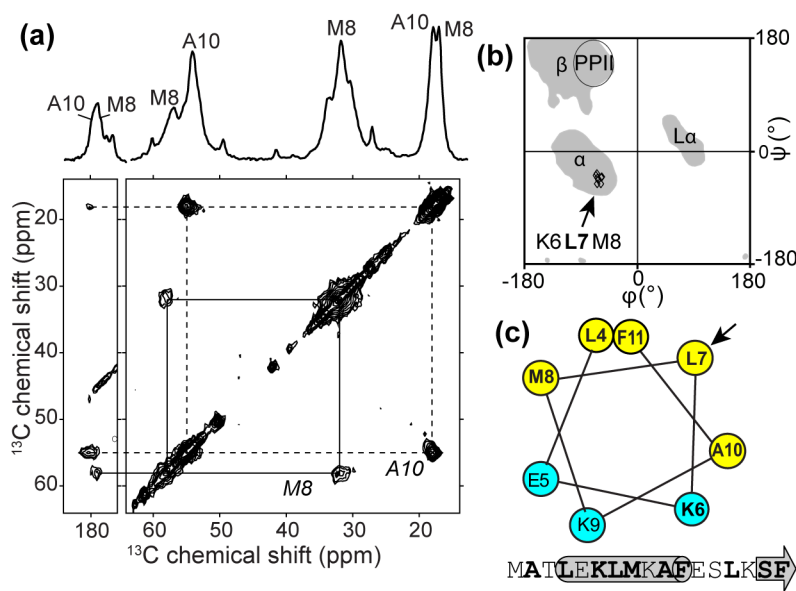

**Figure S3.** (a) 1D and 2D MAS ssNMR spectra obtained on MA-labeled  $htt^{NT}Q_{30}P_{10}K_2$  fibrils. Bottom: aliphatic/carbonyl (vertical section on left) and intra-aliphatic (right) regions of a 2D  $^{13}C$ - $^{13}C$  spectrum obtained with 8ms DARR mixing. Both spectra were acquired at 600MHz ( $^1H$  freq.) and 10 kHz MAS. (b) Ramachandran plot of the backbone torsion angles for L7 (black diamonds) based on the TALOS+ analysis of the chemical shifts of K6, L7, and M8. (c) Helical wheel plot of the  $\alpha$ -helix within  $htt^{NT}$  with ssNMR-probed residues in bold, hydrophilic residues shown in cyan and hydrophobic residues in yellow. Residue L7 (arrow) (labeled here and in ref. <sup>1</sup>) forms the middle of the hydrophobic face, and is thus expected to form part of a hydrophobic “core” upon clustering of the amphipathic  $\alpha$ -helices.

## References Cited in the Supporting Information

1. Sivanandam, V. N.; Jayaraman, M.; Hoop, C. L.; Kodali, R.; Wetzel, R.; van der Wel, P. C. A., The aggregation-enhancing huntingtin N-terminus is helical in amyloid fibrils. *J Am Chem Soc* **2011**, *133* (12), 4558-4566.
